# Supplementary material for: Electrochemical and spectroelectrochemical investigations of quercetin on unmodified and DNA-modified carbon paste electrode and its determination using voltammetry
Source: Royal Society of Chemistry journal article supplement (doi:10.1039/c1ay05026e), 2011-01-01
Supplement: c1ay05026e.pdf [file c1ay05026e.pdf]

## **Supporting information** C1AY05026E

### **Figure captions**

Fig. S1 Cyclic voltammetry of 0.1 mM quercetin in ACN solution using GC electrode with different scan rates of 10, 30, 50, 70, 100, 150, 250, 400, 500  $\text{mVs}^{-1}$ . Inset: variation of peak current of the first oxidation peak with the square root of the scan rates.

Fig. S2 Cyclic voltammetry of 0.1 mM quercetin in methanol solution using GC electrode with different scan rates of 10, 30, 50, 70, 100, 150, 250, 400, 500  $\text{mVs}^{-1}$ . Inset: variation of peak current of the first oxidation peak with the square root of the scan rates.

Fig. S3 Cyclic voltammetry of 0.1 mM quercetin (reduction peak) in ACN solution using HMDE with different scan rates of 50, 100, 200, 300, 400, 500  $\text{mVs}^{-1}$ . Inset: variation of peak current of the reduction peak with the square root of the scan rates.

Fig. S4 Tafel plot of quercetin oxidation in ACN media on CP electrode.

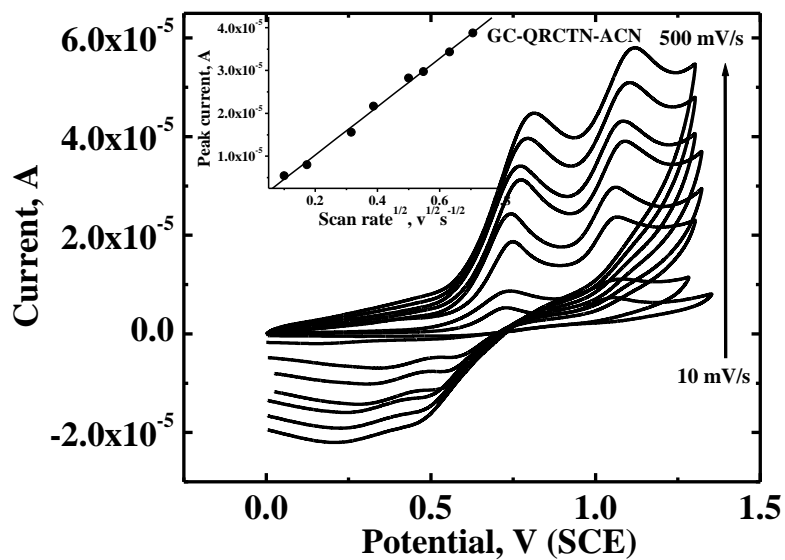

Fig.S1

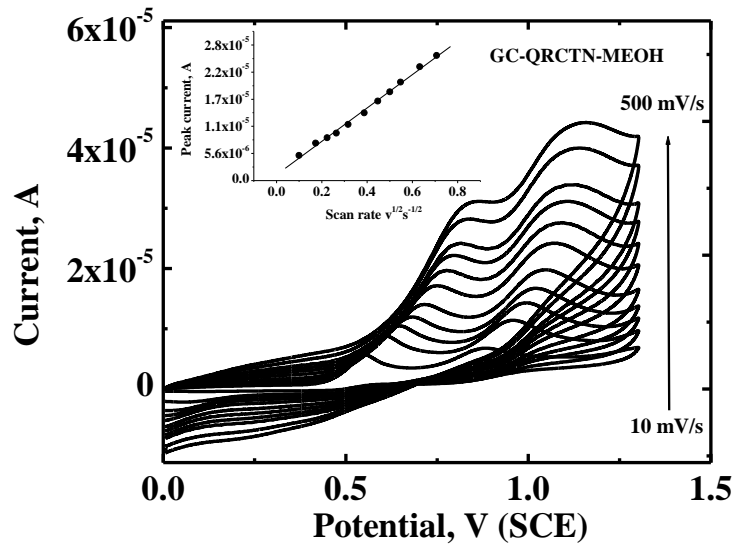

Fig.S2

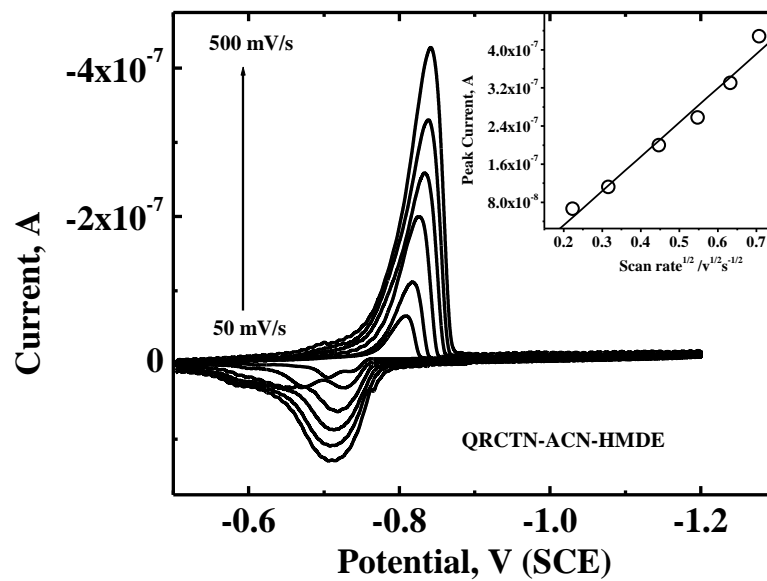

Fig.S3

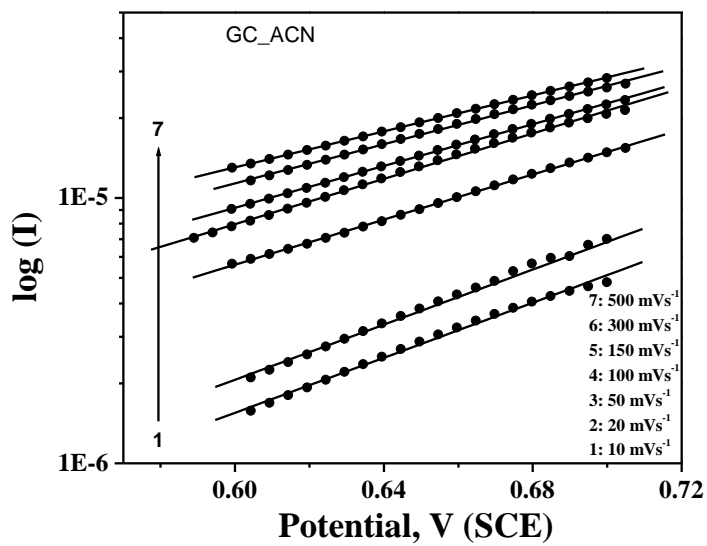

Fig.S4
